# Supplementary material for: Temporal Trends in Incidence of Nutritional Deficiency among Older Adults in China: A Secondary Analysis of the Global Burden of Disease Study 1990–2019
Source: MDPI journal article supplement (doi:10.3390/nu14235008), 2022-11-25
Supplement: s1 [file s1]

Table S1. Average percentage change with 95% CI of nutritional deficiencies, stratified by sex.

| Both                               |         |           | Male                 |         |           | Female               |         |           |
|------------------------------------|---------|-----------|----------------------|---------|-----------|----------------------|---------|-----------|
| APC (95% CI)                       | P value | Period    | APC (95% CI)         | P value | Period    | APC (95% CI)         | P value | Period    |
| <b>Vitamin A deficiency</b>        |         |           |                      |         |           |                      |         |           |
| -6.72 (-7.3, -6.13)                | <0.001  | 1990-1998 | -6.54 (-7.08, -6)    | <0.001  | 1990-2000 | -7.14 (-7.59, -6.69) | <0.001  | 1990-1999 |
| -5.53 (-5.84, -5.22)               | <0.001  | 1998-2013 | -2.96 (-6.61, 0.83)  | 0.118   | 2000-2003 | -5.04 (-5.34, -4.75) | <0.001  | 1999-2012 |
| -2.82 (-6.37, 0.87)                | 0.125   | 2013-2016 | -7.51 (-9.01, -5.97) | <0.001  | 2003-2009 | -2.41 (-5.4, 0.67)   | 0.117   | 2012-2016 |
| -8.02 (-11.08, -4.85)              | <0.001  | 2016-2019 | -5.54 (-6.03, -5.05) | <0.001  | 2009-2019 | -7.22 (-9.95, -4.42) | <0.001  | 2016-2019 |
| <b>Iodine deficiency</b>           |         |           |                      |         |           |                      |         |           |
| -0.07 (-0.13, -0.01)               | 0.027   | 1990-1996 | 0.18 (-0.09, 0.46)   | 0.178   | 1990-1995 | -0.2 (-0.26, -0.13)  | <0.001  | 1990-2000 |
| -0.66 (-0.7, -0.62)                | <0.001  | 1996-2004 | -0.95 (-1.17, -0.74) | <0.001  | 1995-2000 | -1.43 (-1.72, -1.13) | <0.001  | 2000-2004 |
| -0.39 (-0.41, -0.37)               | <0.001  | 2004-2017 | -0.07 (-0.35, 0.21)  | 0.627   | 2000-2005 | 0.18 (0.12, 0.23)    | <0.001  | 2004-2017 |
| -1.5 (-1.68, -1.32)                | <0.001  | 2017-2019 | -1 (-1.06, -0.95)    | <0.001  | 2005-2019 | -1.94 (-2.41, -1.47) | <0.001  | 2017-2019 |
| <b>Protein-energy malnutrition</b> |         |           |                      |         |           |                      |         |           |
| 2.17 (1.79, 2.54)                  | <0.001  | 1990-2000 | 3.65 (3.49, 3.81)    | <0.001  | 1990-2000 | 0.24 (0.15, 0.33)    | <0.001  | 1990-2006 |
| 0.4 (-0.72, 1.53)                  | 0.469   | 2000-2005 | 0.71 (0.37, 1.06)    | <0.001  | 2000-2006 | 4.77 (3.89, 5.66)    | <0.001  | 2006-2010 |
| 3.91 (1.37, 6.51)                  | 0.004   | 2005-2009 | 3.97 (3.28, 4.66)    | <0.001  | 2006-2010 | -2.86 (-3.26, -2.46) | <0.001  | 2010-2016 |
| 1.11 (0.74, 1.48)                  | <0.001  | 2009-2019 | 2.02 (1.87, 2.18)    | <0.001  | 2010-2019 | 5.48 (4.68, 6.29)    | <0.001  | 2016-2019 |

APC: annual percentage change; CI: confidence interval.

Table S2. Autocorrelation evaluation in joinpoint regression models.

|                             | Both sexes combined     |         | Male                    |         | Female                  |         |
|-----------------------------|-------------------------|---------|-------------------------|---------|-------------------------|---------|
|                             | Durbin-Watson statistic | P value | Durbin-Watson statistic | P value | Durbin-Watson statistic | P value |
| Vitamin A deficiency        | 0.61                    | <0.001  | 0.83                    | <0.001  | 0.73                    | <0.001  |
| Iodine deficiency           | 2.20                    | 0.586   | 1.15                    | 0.013   | 1.25                    | 0.030   |
| Protein-energy malnutrition | 0.64                    | <0.001  | 0.89                    | <0.001  | 1.93                    | 0.855   |

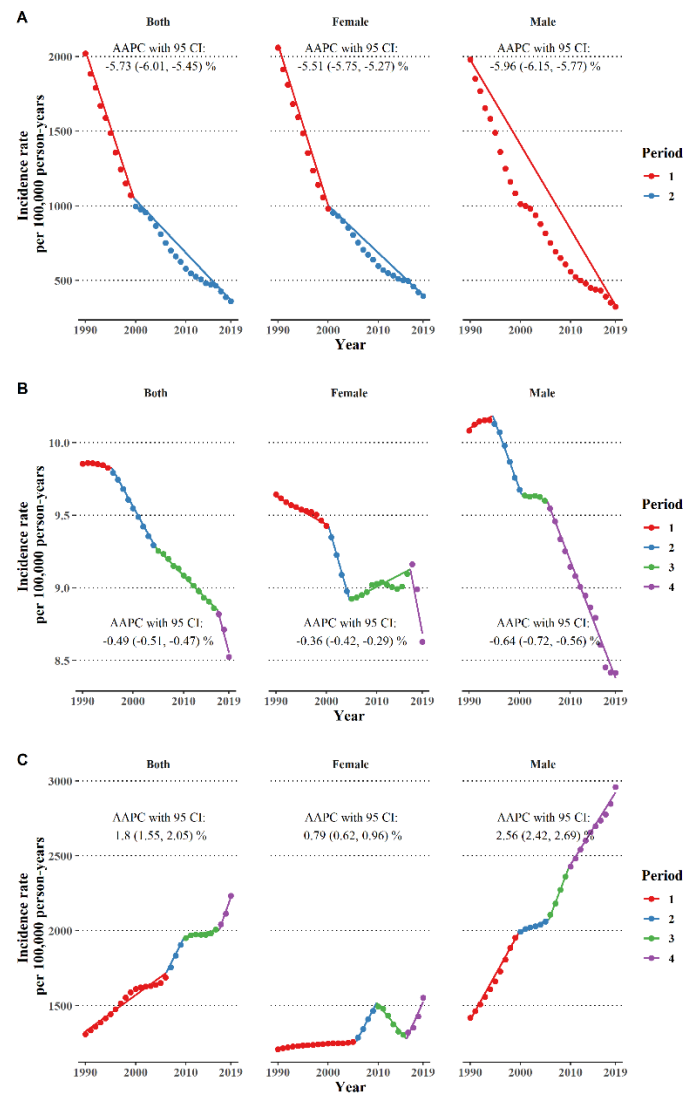

Figure S1. Trends in age-standardized incidence rate per 100,000 person-years of (A) vitamin A deficiency, (B) iodine deficiency, and (C) protein-

energy malnutrition with autocorrelation corrected among the elderly in China from 1990 to 2019, stratified by sex.
